# Supplementary material for: Current Management of Extensive Stage Small Cell Lung Cancer in Italy: A National Survey on Behalf of Italian Association of Radiotherapy and Clinical Oncology (AIRO)
Source: Preprints.org preprint supplement (doi:10.20944/preprints202409.2202.v1), 2024-09-27
Supplement: Supplementary file 1 [file supplementary]

**Table S1. Questions posed to respondents.**

| **DEMOGRAPHICS AND EXPERTISE IN ED-SCLC TREATMENT**   - Which is your medical specialty? - How long have you been working as a radiation oncologist? - What type of healthcare institution do you work for? - What percentage of your time do you spend on lung cancer disease? - In which italian geographical area do you practice? - Which medical figure is usually responsible for/handle patients diagnosis and staging in your Centre? - Do you have a MDT discussion dedicated SCLC cases in your Institution? - How many pts with newly diagnosed SCLC came to your department in the last year? - How many pts with newly diagnosed ES-SCLC came to your department in the last year? |
| --- |
| **MANAGEMENT OF ED-SCLC**  **Role of systemic treatment**   - Which is your first therapeutic approach in case of pts with ED- SCLC and PS=0-1? - What CHT regimen do you prefer in your clinical practice in case of patients with ED- SCLC and PS=0-1? - What CHT regimen do you prefer in your clinical practice in case of patients with ED- SCLC and PS=2 (due to tumour-related symptoms)? - Considering the combination of CHT and IT in patients with ES-SCLC, how many cycles of CHT do you usually plan in your clinical practice?   **Role of PCI**   - Considering the results from IT plus CHT in ES-SCLC and given the possibility of maintenance therapy, do you consider PCI in these patients in your clinical practice? - If prescribed, when PCI is usually performed in your clinical practice? - If prescribed, which radiation technique do you usually choose for PCI?   **Role of thoracic consolidative RT**   - Taking into account the results achieved by consolidation IT in ES-SCLC patients, do you consider RT for intrathoracic disease? - Which schedule do you usually choose for thoracic RT in ES-SCLC patients? - When do you usually start thoracic RT in ES-SCLC?   **Management of oligoPD**   - What treatment do you usually recommend in case of ES-SCLC patient with intracranial oligoPD during manteinance IT? - What treatment do you usually recommend in case of ES-SCLC patient with extracranial oligoPD during manteinance IT? |

*pts* patients, M*DT* multidisciplinary team, *SCLC* small cell lung cancer, *ES-SCLC* extended stage small cell lung cancer, *PS* performance status, *CHT* chemotherapy, *IT* immunotherapy, *PCI* prophylactic cranial irradiation, *RT* radiation therapy, *oligoPD* oligoprogression disease
